# Supplementary material for: RORγ directly regulates the circadian expression of clock genes and downstream targets in vivo
Source: PubMed Central journal article supplement — Nucleic Acids Res. 2012 Jun 28;40(17):8519–35. doi: 10.1093/nar/gks630 (PMC3458568; doi:10.1093/nar/gks630), 2012-06-28
Supplement: supp_gks630_nar-01125-v-2012-File003.pdf [file supp_gks630_nar-01125-v-2012-File003.pdf]

## Supplementary Information and data:

**Supplementary Figure S1.** ROR $\alpha$  and ROR $\gamma$  exhibited a certain degree of redundancy in regulating clock gene expression. The level of *Cry1*, *Bmall*, *Rev-Erb $\alpha$* , *E4bp4*, *Per2*, *Npas2*, and *Clock* mRNA expression in liver, BAT, kidney, and small intestines from WT, ROR $\alpha^{sg/sg}$ , ROR $\gamma^{-/-}$ , and ROR $\alpha^{sg/sg}$ ROR $\gamma^{-/-}$  DKO mice (n=4) was compared at ZT8 and ZT 22. The level of expression was normalized to that of littermate WT mice controls (black bars). Data represent mean  $\pm$ SD; \* P<0.05, \*\*P<0.01, \*\*\* P<0.001 by ANOVA.

**Supplementary Figure S2.** Activation of *Cry1*, *Bmall*, *Rev-Erb $\alpha$* , and *E4bp4* by RORs is mediated through ROREs. (A) Location of the conserved ROREs within the regulatory regions of mouse and human *Cry1*, *E4bp4*, *Bmall*, and *Rev-Erb $\alpha$* . The core motifs of the ROREs are shown in bold and are underlined. The numbers refer to the distance to the transcription start site. (B) RORs effectively activate the *Luc* reporter driven by the RORE-containing regulatory region of *Cry1*, *Bmall*, *Rev-Erb $\alpha$* , and *E4bp4* in Huh-7 cells. Cells were co-transfected with an p3xFlag-CMV10-ROR expression vector, pCMV- $\beta$ -Gal, and a pGL4.27 reporter plasmid driven by the RORE-containing regulatory region of *Cry1*, *Bmall*, *Rev-Erb $\alpha$* , or *E4bp4* or regions in which the ROREs were mutated (RORE1m, RORE2m, and RORE1m2m, respectively). 24 h later the relative luciferase reporter activities were determined as described in Experimental Procedures. The basal activity of each reporter plasmid in cells co-transfected with the empty vector was normalized to 1. Data present mean  $\pm$ SEM, \* P<0.01 by ANOVA.

**Supplementary Figure S3.** The transcriptional regulation of *Clock* by ROR $\gamma$  and ROR $\alpha$  *in vivo* involves recruitment to the *Clock*(RORE). (A) RORs were able to effectively activate the (+511/+827) *Clock* proximal promoter in Huh-7. The RORE was mutated from GGGTCA to GAATCA which is designated as ROREm. (B) The inverse agonist, T0901317, represses the activation of the *Clock* promoter by both ROR $\alpha$  and ROR $\gamma$  in Huh-7 cells. Data present mean  $\pm$ SEM, \* P<0.01 by ANOVA. (C) *Clock* mRNA expression was examined by QRT-PCR analysis in Hepa1-6 stable cells described above (n=5). The expression of *Clock* in Hepa1-6(Empty) was normalized to 1. (D) RORs and Rev-Erb $\alpha$  were recruited to the *Clock* promoter in Hepa1-6 cells. ChIP analysis was performed with the Hepa1-6 stable cell lines and anti-Flag M2 antibody. Hepa1-6(Empty) served as a negative control. ChIP analysis was performed with anti-ROR antibodies using liver tissues (n=4) isolated from WT, ROR $\alpha^{sg/sg}$ , and ROR $\gamma^{-/-}$  mice at CT22. QPCR amplification of a non RORE-containing distal site of the *Clock* gene was used as a negative control. Data represent mean  $\pm$ SEM; \*\* P < 0.01, \*\*\* P < 0.001 by ANOVA.

**Supplementary Figure S4.** Regulation of clock genes by wild type and mutant RORs in brown adipocytes and its inhibition by T0901317. (A) Relative expression of *Cry1*, *Bmall*, *Rev-Erb $\alpha$* , *E4bp4*, and *ROR $\alpha$*  mRNA in BAT(E), BAT(ROR $\gamma$ ), and BAT(ROR $\gamma$ E502Q) brown adipocytes stably expressing the empty vector, ROR $\gamma$ , or the ROR $\gamma$ E502Q mutant lacking transcriptional activity. BAT(ROR $\gamma$ ) cells were also treated for 24 h with vehicle or the ROR antagonist T0901317 (10  $\mu$ M). (B) Relative expression of *Cry1*, *Bmall*, *Rev-Erb $\alpha$* , *E4bp4*, and *ROR $\gamma$*  in BAT(E), BAT(ROR $\alpha$ ), and BAT(ROR $\alpha$  $\Delta$ AF2) brown adipocytes stably expressing the empty vector, ROR $\alpha$ , or the

ROR $\alpha$  $\Delta$ AF2 mutant lacking transcriptional activity. The expression of each gene in BAT(E) cells was normalized to 1. Data represent mean  $\pm$ SEM; \*\* P < 0.01, \*\*\* P < 0.001 by ANOVA.

**Supplementary Figure S5.** Schematic presentation of the reciprocal transcriptional regulation of clock genes and *ROR $\gamma$ 1* in peripheral tissues and the control of down-stream ROR $\gamma$  target genes. *In vivo*, ROR $\gamma$ 1 modulates the peak expression of *Bmal1*, *Npas2*, *Cry1*, and *E4bp4* during ZT20-0, while Rev-Erb $\alpha$  represses the transcription of these clock genes, as well as *ROR $\gamma$ 1*, during ZT8-12. *Bmal1*/*Clock*/*Npas2* positively regulate the expression of *ROR $\gamma$ 1*. ROR $\gamma$ 1 might function as an intermediary, providing a link between the clock machinery and its regulation of metabolic genes. *Bmal1*/*Clock* and Rev-Erb regulate the rhythmic expression of *ROR $\gamma$ 1* and as a result the rhythmic expression of downstream target genes, such as *Avpr1a*. The circadian expression of *Avpr1a* may depend on the rhythmic expression of *ROR $\gamma$ 1* and to a certain degree on Rev-Erb through its regulation of *ROR $\gamma$ 1* and/or its competition with ROR $\gamma$ 1 for *Avpr1a*(RORE) binding.

**Supplementary Table S1. A series of nucleotide sequences for QPCR primers**

| Gene             | Sense primer              | Antisense primer         |
|------------------|---------------------------|--------------------------|
| <i>mRORα1</i>    | GAGGTATCTCAGTCACGAAG      | AACAGTTCTTCTGACGAGGACAGG |
| <i>mRORα4</i>    | TGTGATCGCAGCGATGAAAG      | AACAGTTCTTCTGACGAGGACAGG |
| <i>mRORγ</i>     | ACTACGGGGTTATCACCTGTGAG   | GTGCAGGAGTAGGCCACATTAC   |
| <i>mGapdh</i>    | AGTATGACTCCACTCACGGCAAAT  | GTCTCGCTCCTGGAAGATGGT    |
| <i>mBmal1</i>    | AACCTTCCCGCAGCTAACAG      | AGTCCTCTTTGGGCCACCTT     |
| <i>mNpas2</i>    | CGCAGATGTTTCGAGTGAAAG     | GTGCATTAAGGGGCTGTGGAG    |
| <i>mCry1</i>     | AGGAGGACAGATCCCAATGGA     | GCAACCTTCTGGATGCCTTCT    |
| <i>mRev-Erbα</i> | CATGGTGCTACTGTGTAAGGTGTGT | CACAGGCGTGCACTCCATAG     |
| <i>mE4bp4</i>    | ACGACCAGGGAGCAGAAC        | GGACTTCAGCCTCTCATCCATC   |
| <i>mClock</i>    | GGCGTTGTGATTGGACTAGG      | GAATGGAGTCTCCAACACCCA    |
| <i>mPer2</i>     | AGAACGCGGATATGTTTGCTG     | ATCTAAGCCGCTGCACACACT    |
| <i>mAvpr1a</i>   | CAATGTCCGAGGGAAGACAG      | AATGCTCTTCACGCTGCTGAC    |

**Supplementary Table S2. A series of nucleotide sequences for ChIP-QPCR primers**

| Gene                      | Sense primer                | Antisense primer               |
|---------------------------|-----------------------------|--------------------------------|
| <i>mCry1</i> E-box        | GCGAGAACTCAGGTCGTGAG        | GCTTCTCATTGGCGGGCATG           |
| <i>mRORγ</i> -1179/-1042  | GCTAAGAACGGCTATTCCTCCTAATC  | TTCGCTCCCAGCATTCCATTCC         |
| <i>mRORγ</i> -160/-70     | CAAGGCCTGGCAAAAACCTCAG      | GACCAGTGCTGGAGTCTTGAG          |
| <i>mRORγ</i> distal       | AAGCACAGAATAGTGCTTGGGTAC    | ACCTTCATCTTCTGGCTGGAG          |
| <i>mBmal1</i> RORE1,2     | GGATTGGTCGGAAAGTAGGTTAG     | GGTAAACAGGCACCTCCGTC           |
| <i>mCry1</i> RORE1,2      | TCAGTAGCAGTGGGATTATGTTGTATC | GAAGTGGCATAAGGAAGTTACTACATGT   |
| <i>mCry1</i> RORE3        | GATGTGGCTTGTGCCATTCTAAG     | CTATGCTAGAGGAAGGGCATCTC        |
| <i>mRev-Erbα</i> -RORE1,2 | GTAGACTACAAATCCCAACAATCCTG  | TGGAGCAGGTACCATGTGATTG         |
| <i>mE4bp4</i> -RORE1      | GCAGTGAGAGATGGCTCATGTG      | GAAGTCACTCAGCAGTCCAAAGTC       |
| <i>mGapdh</i>             | GTATGACTCCACTCACGGCAAAT     | GTCTCGCTCCTGGAAGATGGT          |
| <i>mBmal1</i> distal      | GCCTGCCTCTTGAGGATG          | GGCATCTGGCACTGAGGAG            |
| <i>mCry1</i> distal       | CCAGCCTGTCTACAGAGTAAAGTTC   | GAGAACAGAACTACAGAACTAACAAGTGTG |
| <i>mRev-Erbα</i> distal   | CATGGTGCTACTGTGTAAGGTGTGT   | CACAGGCGTGCACTCCATAG           |
| <i>mE4bp4</i> distal      | GCTGCCAAGGGACTCACT          | GATGGATGAGAGGCTGAAGTCC         |
| <i>mBmal1</i> +661/+745   | CTTGCTGGTCAACCCTTCTAC       | TACGGACTCCCCGACTTGAC           |
| <i>mBmal1</i> -355/-284   | CTCAGCGAGCTTTAGACCTGAG      | ACCAATTGGCACGCTCTGTG           |
| <i>mBmal1</i> 3' end      | TACAGGGCTGGTTCATCCACTTC     | CTAAGCTGGTAGCATGGAAGAAGTC      |
| <i>mClock</i> RORE        | TAGGCCTGTGACCCACTTTATTC     | TCCAAACGTGCCGAGTG              |
| <i>mClock</i> distal      | ACAGAGTTCTGATGGTCAGTCACAC   | GAATGGAGTCTCCAACACCCA          |
| <i>mClock</i> distal      | ACAGAGTTCTGATGGTCAGTCACAC   | GAATGGAGTCTCCAACACCCA          |
| <i>mAvpr1a</i> RORE       | CGACCTTGTATTTCCATCCATC      | CACACGCAGAGCAAGATTGAAG         |

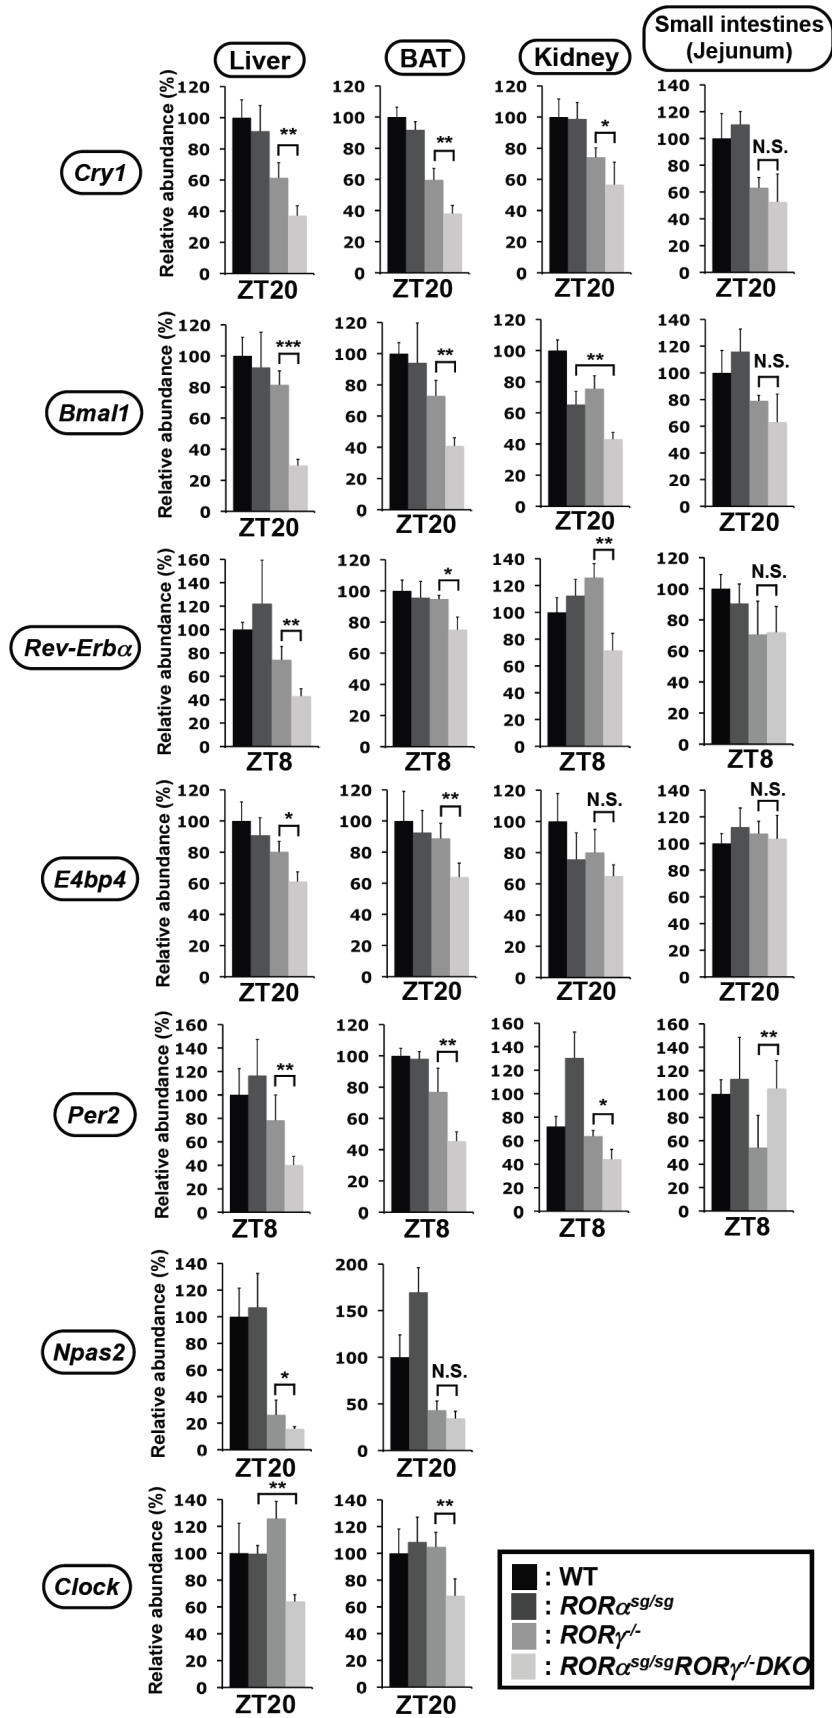

Supplemental Figure 1

**A**

```

                                RORE1
mCry1      GACAGAACTAGAATACTAGTTATATAA-GCTGTCCTAGCACAGACTAGAAAAGTGGTCA +23091
hCry1      GACAGAACTAGAATTCTAGTTATATAAAGCTGTTCTAGCACAGACTGTAAGTGGTCA +66019
*****

                                RORE2
mCry1      TTGTGATGGGAGTATGCTAAACCCCACTGGTTGCTATAGCGAAGACCTACTTTAG-AA +23150
hCry1      TTGTGACGG-AGTATACTAAACCGTCCACTGGTTGCTATAGCAATGACCTACTTTAGGAA +66078
*****

                                RORE1
mBmal1     GGTCGGAAGTACGTTAGTGTGCGACATTTAGGGAAGGCAGAAGTAGGTCAGGGACGG +90
hBmal1     GGTCGGAAGTACGTTAGTGTGCGACATTTAGGGAAGGCAGAAGTAGGTCAGGGACGG +329
*****

                                RORE1 RORE2
mRev-Erba  CGCACA-GATCTCAACGTGCCGGCTGCTGGAAAAGTGTCTCACTGGGCAAGAGGCGCTC -118
hRev-Erba  CGCGCAAGAGCTCAACGTGCCGGCTGTTGGAAAAGTGTCTCACTGGGCAAGAGGCGCTC +10
*****

                                RORE1
mE4bp4     TTTACAGATGCATCCAAACAGAAAAGTGGTCAATTGTTGCCGAGATAGGGCTGGC-C +6125
hE4bp4     TTTACAGAGGCACCCAAATAGAAAAGTGGTCAATTGTTGCTATAGATAGATTC +6024
*****

```

**B**

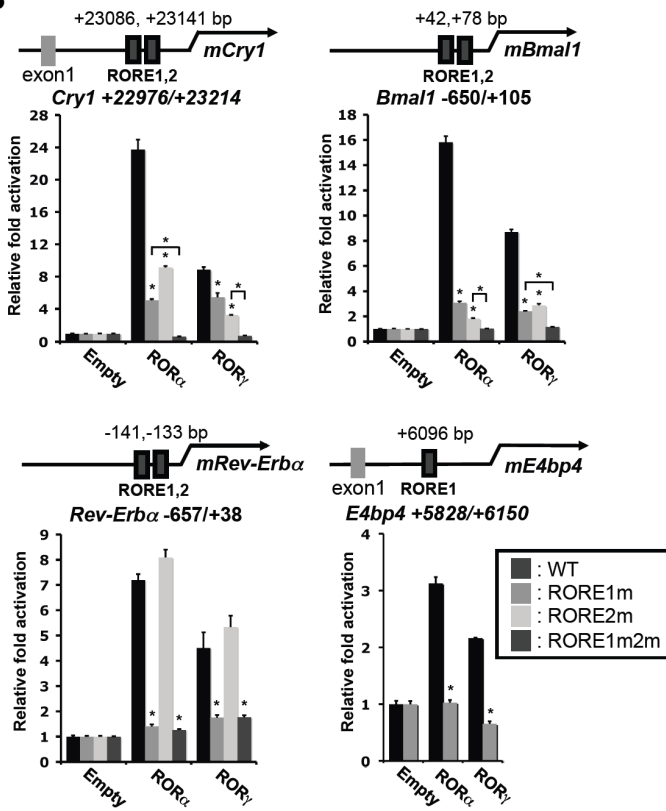

Supplemental Figure 2

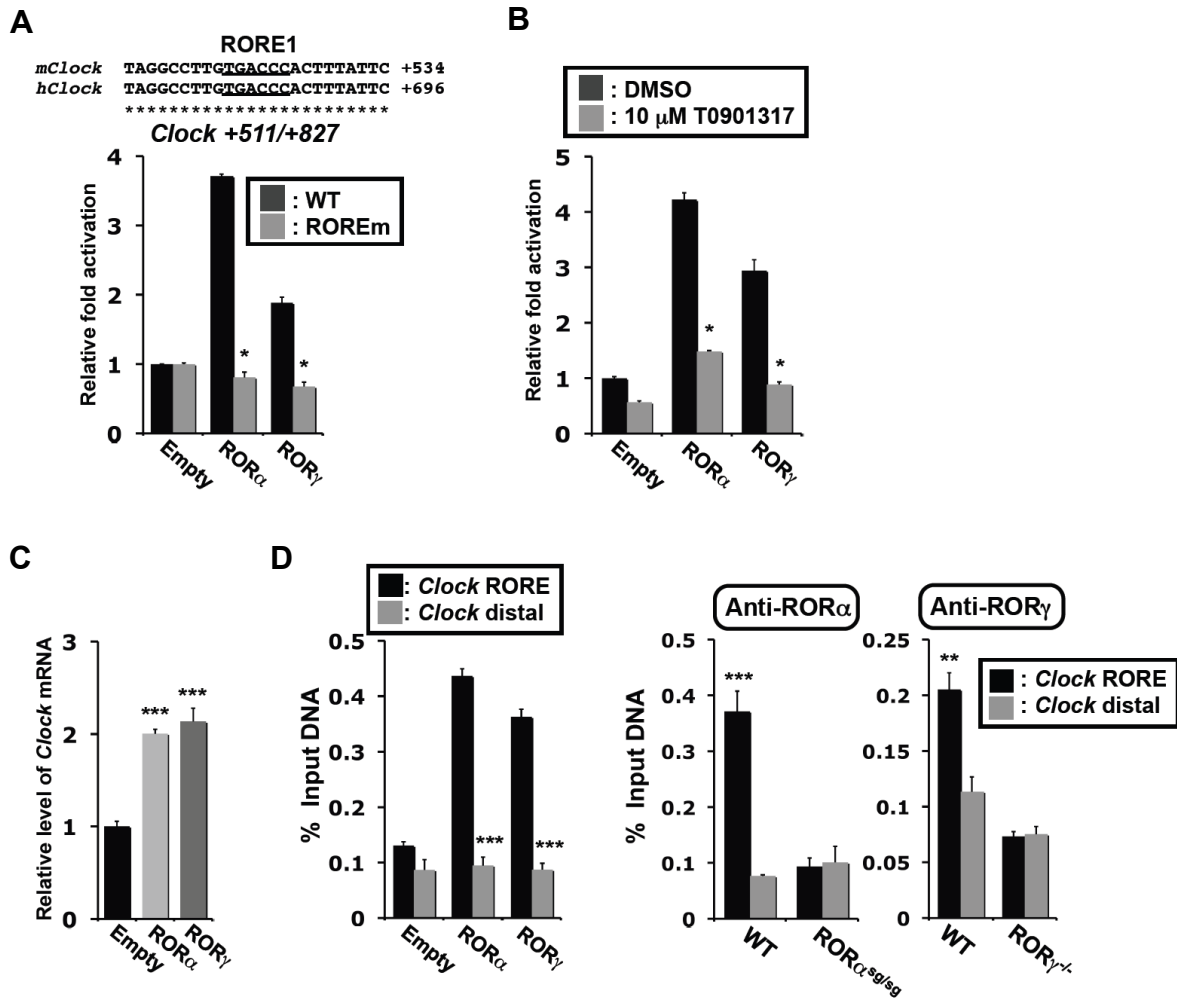

Supplemental Figure 3

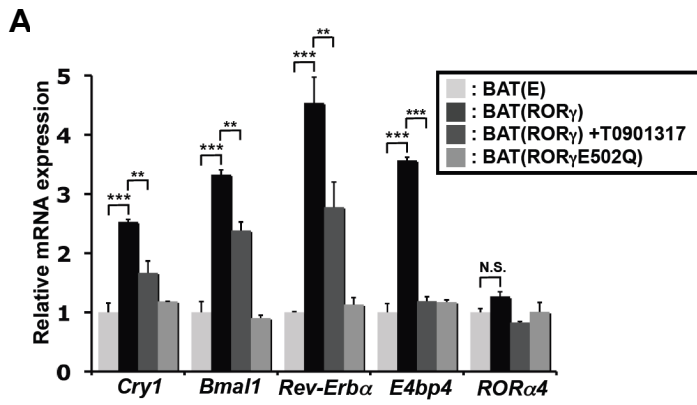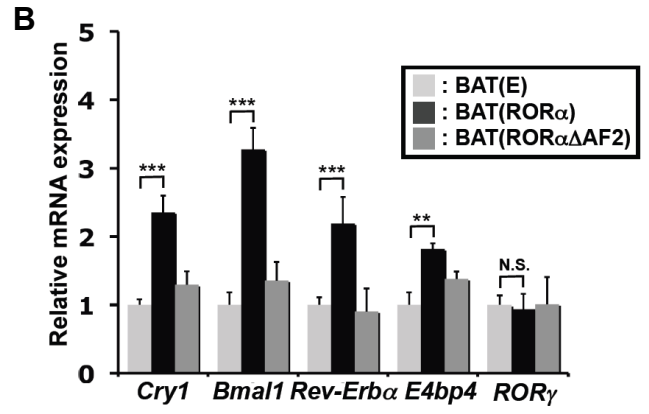

Supplemental Figure 4



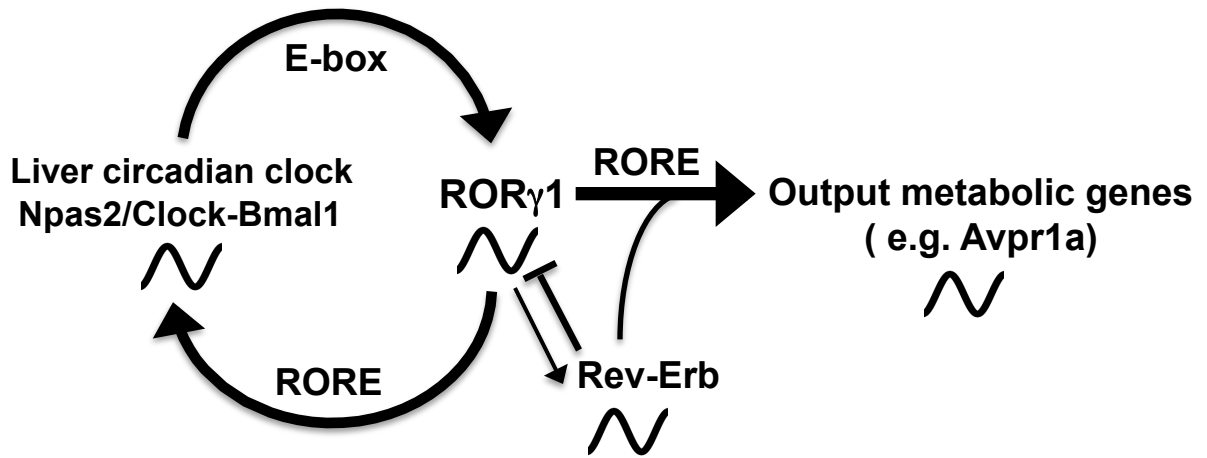

Supplemental Figure 5
